# Supplementary material
Source: PubMed Central journal article supplement (PMC6330159)

Fig S1. HPLC analysis of Scalarin used in this study

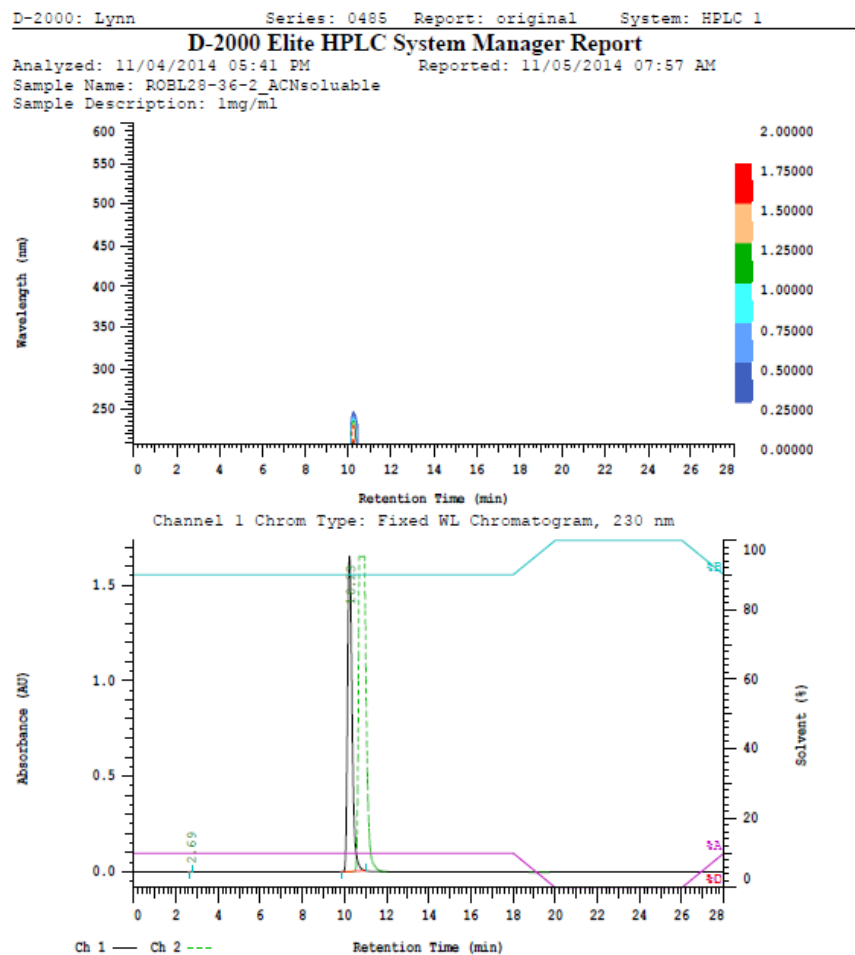

Vydac TP18 Protein and Peptide Column (4.6 x 150 mm, 5  $\mu$  particle size), Solvent A:  $\text{H}_2\text{O}:\text{CH}_3\text{CN}$  95:5 Solvent B: 100%  $\text{CH}_3\text{CN}$  flow = 1 ml/min; t=0 min. A:B (90:10); t=18 min A:B (90:10); t=20 min 100% B, hold for 6 minutes.

Figure S2.  $^1\text{H}$  NMR spectrum of scalarin used in this study measured at 600 MHz in acetonitrile- $\text{d}_3$

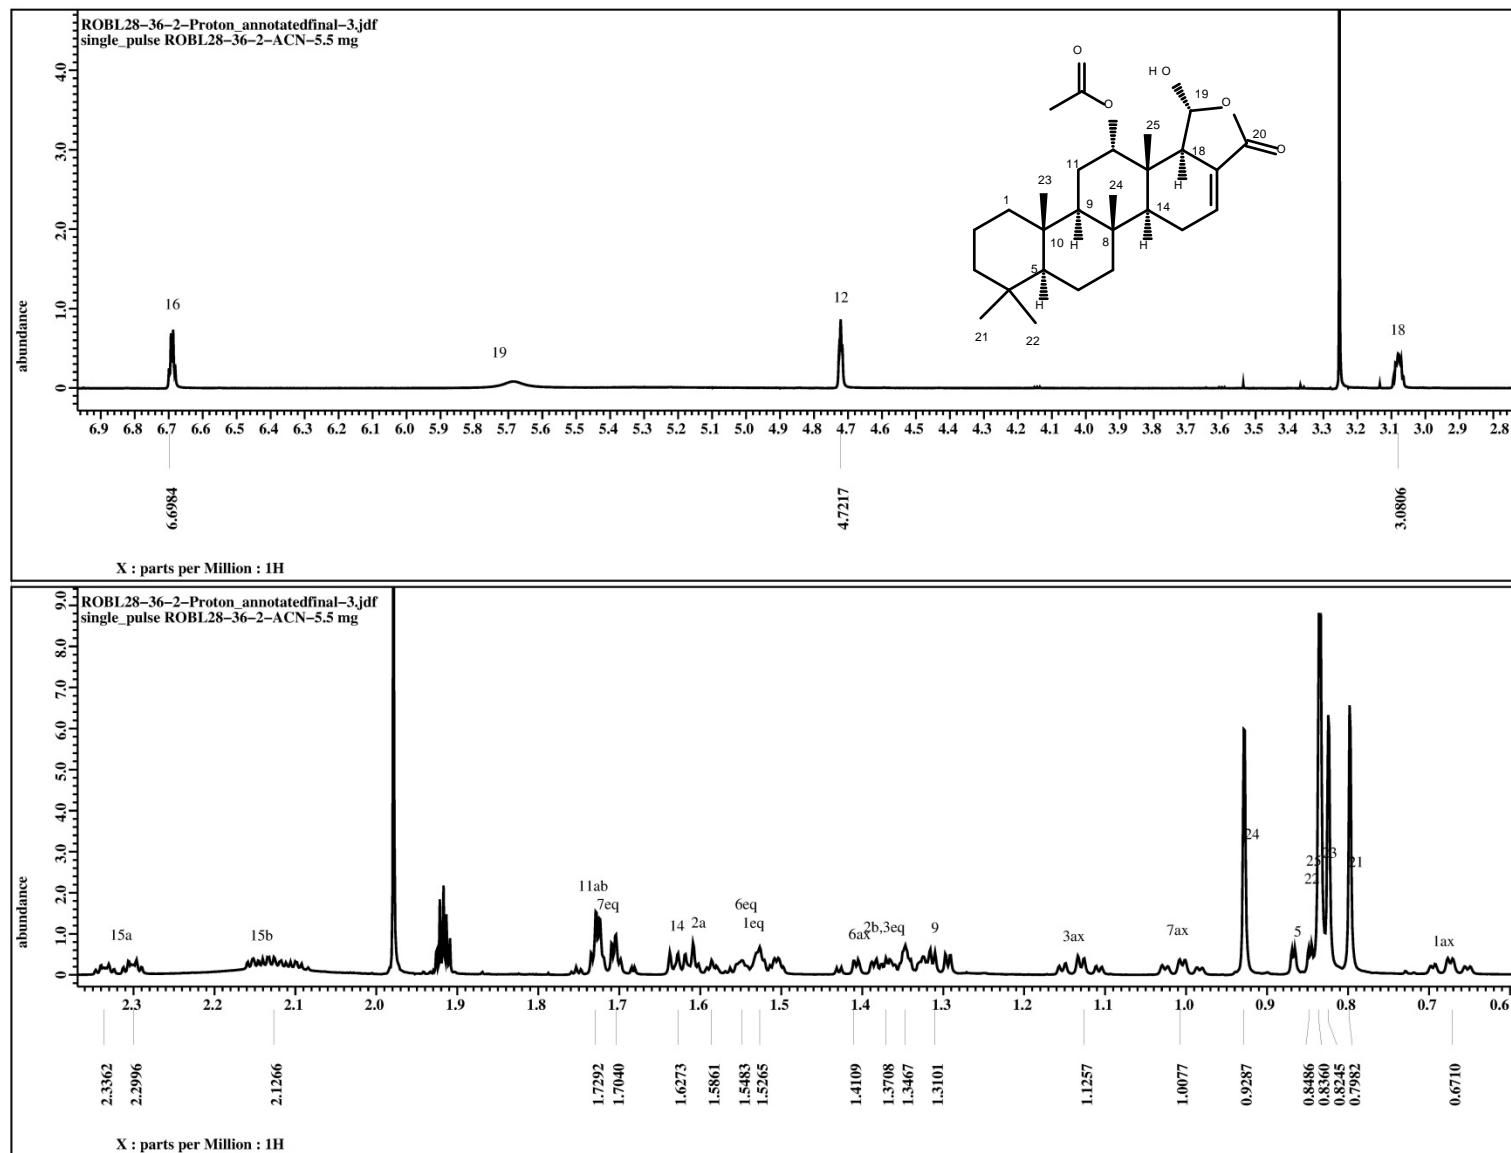

Figure S3.  $^{13}\text{C}$  NMR spectrum of scalarin used in this study measured at 150 MHz in acetonitrile- $\text{d}_3$

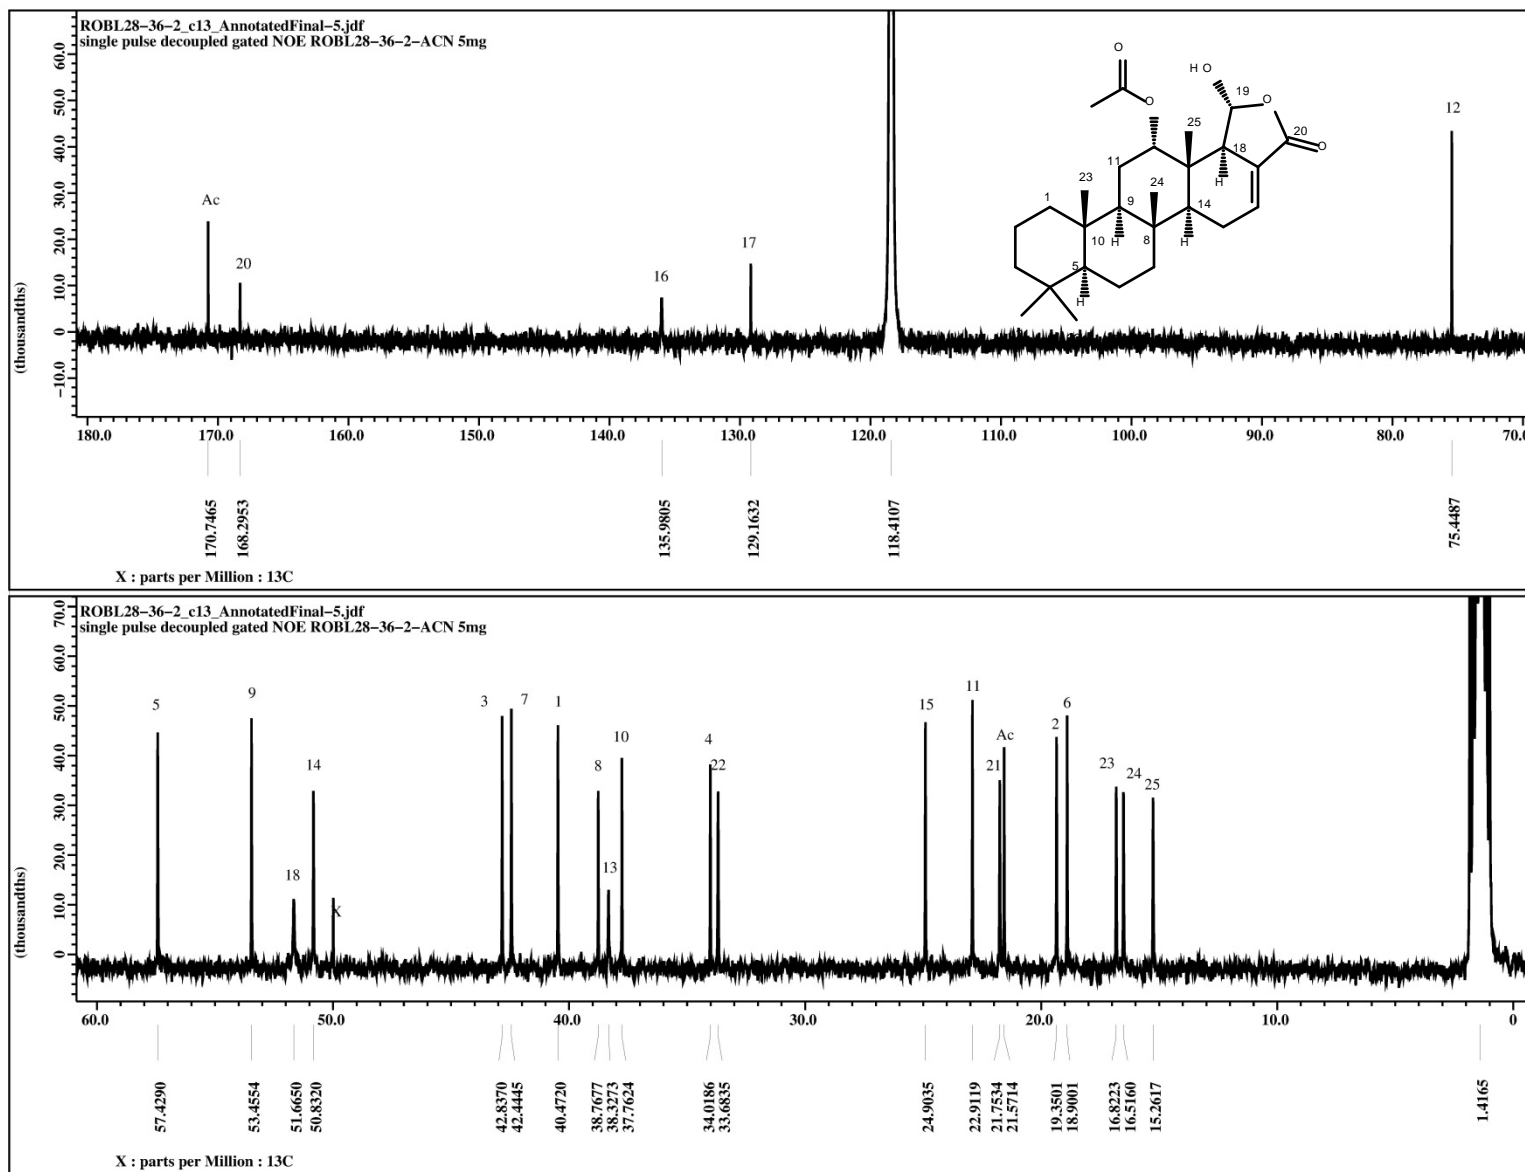

Supplement: NIHMS981064-supplement-10637_2018_635_MOESM2_ESM.pdf [file NIHMS981064-supplement-10637_2018_635_MOESM2_ESM.pdf]
